# Supplementary material
Source: publisher figshare collection journal article supplement (https://asha.figshare.com/articles/dataset/_/14044082)
Supplement: Supplementary file 1 [file 1]

Call:

```
lm(formula = change_in_ED ~ auditory_1_scale + somato_1_scale, data = data.y)
```

Residuals:

| Min     | 1Q      | Median | 3Q     | Max    |
|---------|---------|--------|--------|--------|
| -1.1766 | -0.3502 | 0.1074 | 0.3737 | 1.1371 |

Coefficients:

|                  | Estimate  | Std. Error | t value | Pr(> t ) |
|------------------|-----------|------------|---------|----------|
| (Intercept)      | -0.360541 | 0.144363   | -2.497  | 0.0231*  |
| auditory_1_scale | 0.016155  | 0.009708   | 1.664   | 0.1144   |
| somato_1_scale   | -0.166845 | 0.141864   | -1.176  | 0.2558   |

---

Signif. codes: 0 '\*\*\*' 0.001 '\*\*' 0.01 '\*' 0.05 '.' 0.1 ' ' 1

Residual standard error: 0.6456 on 17 degrees of freedom

Multiple R-squared: 0.1663, Adjusted R-squared: 0.06823

F-statistic: 1.696 on 2 and 17 DF, p-value: 0.2131

Adjusted p-values:

|             |                  |                |
|-------------|------------------|----------------|
| (Intercept) | auditory_1_scale | somato_1_scale |
| 0.06920063  | 0.22881519       | 0.25576634     |
| AIC         |                  |                |
| 44.00472    |                  |                |
| BIC         |                  |                |
| 47.98764    |                  |                |

Call:

lm(formula = change\_in\_ED ~ auditory\_1\_scale + PAT\_score\_scale, data = data.y)

Residuals:

| Min     | 1Q      | Median | 3Q     | Max    |
|---------|---------|--------|--------|--------|
| -1.2429 | -0.2779 | 0.1067 | 0.3589 | 1.2904 |

Coefficients:

|                  | Estimate  | Std. Error | t value | Pr(> t ) |
|------------------|-----------|------------|---------|----------|
| (Intercept)      | -0.360541 | 0.146867   | -2.455  | 0.0252*  |
| auditory_1_scale | 0.015312  | 0.009835   | 1.557   | 0.1379   |
| PAT_score_scale  | 0.010985  | 0.012588   | 0.873   | 0.395    |

---

Signif. codes: 0 '\*\*\*' 0.001 '\*\*' 0.01 '\*' 0.05 '.' 0.1 ' ' 1

Residual standard error: 0.6568 on 17 degrees of freedom

Multiple R-squared: 0.1371, Adjusted R-squared: 0.03562

F-statistic: 1.351 on 2 and 17 DF, p-value: 0.2854

Adjusted p-values:

|             |                  |                 |
|-------------|------------------|-----------------|
| (Intercept) | auditory_1_scale | PAT_score_scale |
| 0.07548517  | 0.27583195       | 0.39498831      |
| AIC         |                  |                 |
| 44.69267    |                  |                 |
| BIC         |                  |                 |
| 48.6756     |                  |                 |

Call:

lm(formula = change\_in\_ED ~ auditory\_1\_scale + BB\_scale, data = data.y)

Residuals:

| Min      | 1Q      | Median   | 3Q     | Max     |
|----------|---------|----------|--------|---------|
| -1.08606 | -0.1707 | -0.02179 | 0.1943 | 1.16458 |

Coefficients:

|                  | Estimate   | Std. Error | t value | Pr(> t ) |
|------------------|------------|------------|---------|----------|
| (Intercept)      | -0.3605413 | 0.1267804  | -2.844  | 0.0112*  |
| auditory_1_scale | -0.0002009 | 0.0097472  | -0.021  | 0.9838   |
| BB_scale         | -1.5818628 | 0.6050355  | -2.614  | 0.0181*  |

---

Signif. codes: 0 '\*\*\*' 0.001 '\*\*' 0.01 '\*' 0.05 '.' 0.1 ' ' 1

Residual standard error: 0.567 on 17 degrees of freedom

Multiple R-squared: 0.357, Adjusted R-squared: 0.2814

F-statistic: 4.72 on 2 and 17 DF, p-value: 0.02343

Adjusted p-values:

| (Intercept) | auditory_1_scale | BB_scale   |
|-------------|------------------|------------|
| 0.03365872  | 0.98379659       | 0.03625589 |

AIC

38.80985

BIC

42.79278
