# Supplementary material
Source: publisher figshare collection journal article supplement (https://asha.figshare.com/articles/dataset/_/14044082)
Supplement: Supplementary file 2 [file 1]

**Supplemental Material S2:** Full list of stimuli in the phonetic awareness task

**Part A. Do you use the front or the back of your tongue?**

Press ‘f’ or ‘b’ to record the participant’s response.

|           |                   | Correct | Incorrect Production | Comments                                                                                                                                                                                                                                                            |
|-----------|-------------------|---------|----------------------|---------------------------------------------------------------------------------------------------------------------------------------------------------------------------------------------------------------------------------------------------------------------|
| PRAC<br>1 | /θ/ like in think | f       |                      | “Good. You use the front of the tongue to say /θ/.”<br>OR<br>“Not quite. You use the front of the tongue to say /θ/.”<br>If child seems to be focused on the vowel sound, say “Pay attention to the first sound, the consonant sound, when you make your decision.” |
| 2.        | /z/ like in zero  | f       |                      |                                                                                                                                                                                                                                                                     |
| 3.        | /t/ like in tea   | f       |                      |                                                                                                                                                                                                                                                                     |
| 4.        | /k/ like in king  | b       |                      |                                                                                                                                                                                                                                                                     |
| 5.        | /d/ like in dig   | f       |                      |                                                                                                                                                                                                                                                                     |
| 6.        | /s/ like in see   | f       |                      |                                                                                                                                                                                                                                                                     |
| 7.        | /l/ like in lead  | f       |                      |                                                                                                                                                                                                                                                                     |
| 8.        | /g/ like in go    | b       |                      |                                                                                                                                                                                                                                                                     |
| 9.        | /n/ like in new   | f       |                      |                                                                                                                                                                                                                                                                     |

Measures of somatosensory acuity in adults

**Part B. Which vowel is further back?**

Press '1' or '2' to indicate if the participant chose the first or the second response.

|           |                                             | Correct | Incorrect Production | Comments                                                                                                                                                           |
|-----------|---------------------------------------------|---------|----------------------|--------------------------------------------------------------------------------------------------------------------------------------------------------------------|
| PRAC<br>1 | 'ah' like in 'hot'<br>'ey' like in 'hate'   | 1       |                      | “Good. For /a/ the tongue is further back in the mouth than for /e/.”<br>OR<br>“Not quite. For /e/ the tongue is forward in the mouth. It’s further back for /a/.” |
| PRAC<br>2 | 'ooh' like in 'hoot'<br>'ee' like in 'heat' | 1       |                      | “Good. For /u/ the tongue is further back in the mouth than for /i/.”<br>OR<br>“Not quite. For /i/ the tongue is forward in the mouth. It’s further back for /u/.” |
| 3.        | 'ey' like in 'hate.'<br>'oh' like in 'hoed' | 2       |                      |                                                                                                                                                                    |
| 4.        | 'ih' like in 'hit'<br>'ooh' like in 'hoot'  | 2       |                      |                                                                                                                                                                    |
| 5.        | 'ah' like in 'hot'<br>'ae' like in 'hat'    | 1       |                      |                                                                                                                                                                    |
| 6.        | 'ih' like in 'pit'<br>'oo' like in 'put'    | 2       |                      |                                                                                                                                                                    |
| 7.        | 'eh' like in 'pen'<br>'aw' like in 'paw'    | 2       |                      |                                                                                                                                                                    |
| 8.        | 'ah' like in 'pot'<br>'eh' like in 'pet'    | 1       |                      |                                                                                                                                                                    |
| 9.        | 'ey' like in 'fate'<br>'oo' like in 'foot'  | 2       |                      |                                                                                                                                                                    |

Measures of somatosensory acuity in adults

**Part C. Which vowel is lower?**

Press '1' or '2' to indicate if the participant chose the first or the second response.

|        |                                              | Correct | Incorrect Production | Comments                                                                                                                                            |
|--------|----------------------------------------------|---------|----------------------|-----------------------------------------------------------------------------------------------------------------------------------------------------|
| PRAC 1 | 'ah' like in 'hot'<br>'ee' like in 'heat'    | 1       |                      | “Good. For /a/ the tongue is lower in the mouth than for /i/.”<br>OR<br>“Not quite. For /i/ the tongue is higher in the mouth. It’s lower for /a/.” |
| 2.     | 'ooh' like in 'loon'<br>'aw' like in 'lawn'  | 2       |                      |                                                                                                                                                     |
| 3.     |                                              |         |                      |                                                                                                                                                     |
| 4.     | 'eh' like in 'bet'<br>'ee' like in 'beet'    | 1       |                      |                                                                                                                                                     |
| 5.     | 'ooh' like in 'hoot'<br>'uh' like in 'hut'   | 2       |                      |                                                                                                                                                     |
| 6.     | 'ah' like in 'hop'<br>'oh' like in 'hope'    | 1       |                      |                                                                                                                                                     |
| 7.     | 'oo' like in 'foot'<br>'aw' like in 'fought' | 2       |                      |                                                                                                                                                     |
| 8.     | 'ey' like in 'hate'<br>'ee' like in 'heat'   | 2       |                      |                                                                                                                                                     |
| 9.     | 'ah' like in 'hot'<br>'ooh' like in 'hoot'   | 1       |                      |                                                                                                                                                     |

Measures of somatosensory acuity in adults

**Part D. Which vowel is higher?**

Press '1' or '2' to indicate if the participant chose the first or the second response.

|    |                                              | Correct | Incorrect Production | Comments |
|----|----------------------------------------------|---------|----------------------|----------|
| 1. | 'aw' like in 'lawn'<br>'ooh' like in 'loon'  | 2       |                      |          |
| 2. |                                              |         |                      |          |
| 3. | 'ee' like in 'beet'<br>'eh' like in 'bet'    | 1       |                      |          |
| 4. | 'uh' like in 'hut'<br>'ooh' like in 'hoot'   | 2       |                      |          |
| 5. | 'ah' like in 'hot'<br>'ee' like in 'heat'    | 2       |                      |          |
| 6. | 'oh' like in 'hope'<br>'ah' like in 'hop'    | 1       |                      |          |
| 7. | 'aw' like in 'fought'<br>'oo' like in 'foot' | 2       |                      |          |
| 8. | 'ooh' like in 'hoot'<br>'ah' like in 'hot'   | 1       |                      |          |
| 9. | 'ee' like in 'heat'<br>'ey' like in 'hate'   | 2       |                      |          |
